# Supplementary material for: Ncm, a Photolabile Group for Preparation of Caged Molecules: Synthesis and Biological Application
Source: PubMed Central journal article supplement (PMC5047466; doi:10.1371/journal.pone.0163937), 2016-10-03

**S4 Fig. Spontaneous hydrolysis of  $\gamma$ -O-Ncm-Glu**

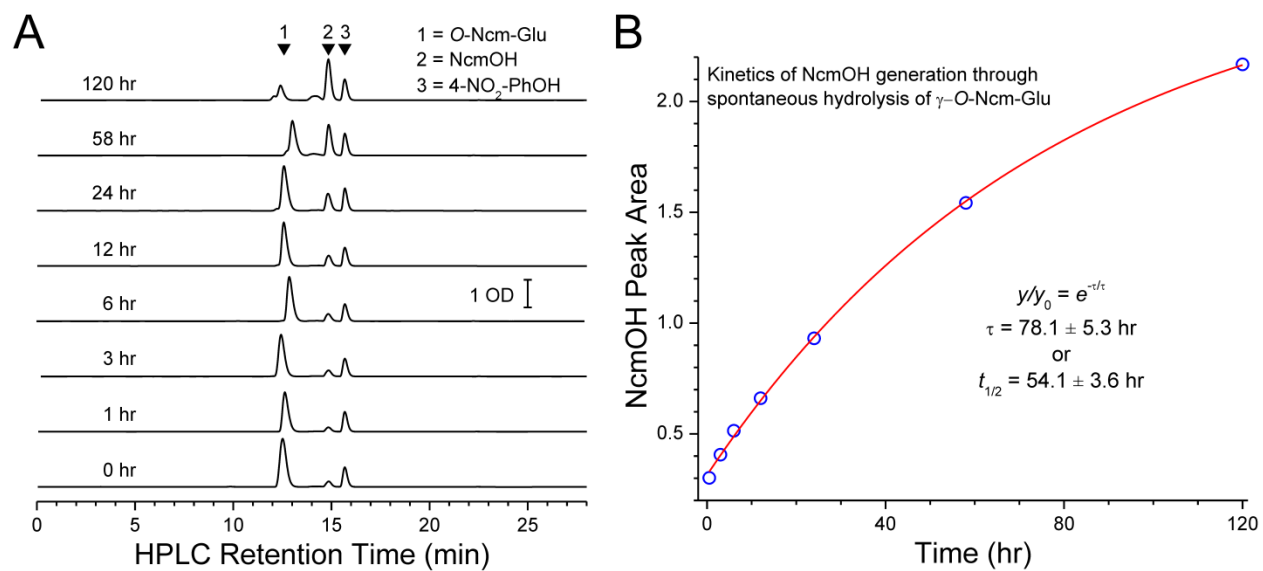

Supplement: pone.0163937.s003.pdf [file pone.0163937.s003.pdf]
