# Supplementary material for: Ncm, a Photolabile Group for Preparation of Caged Molecules: Synthesis and Biological Application
Source: PubMed Central journal article supplement (PMC5047466; doi:10.1371/journal.pone.0163937), 2016-10-03
Supplement: pone.0163937.s007.pdf [file pone.0163937.s007.pdf]

### S7 Text. Estimating the $pK_a$ values of the $\alpha$ -amino groups of *N*-Ncm amino acids

The  $pK_a$ s of the  $\alpha$ -amino groups of the *N*-Ncm amino acids can be estimated by using linear free energy relationships (LFER) [2]. The approach is summarized in the figure below.

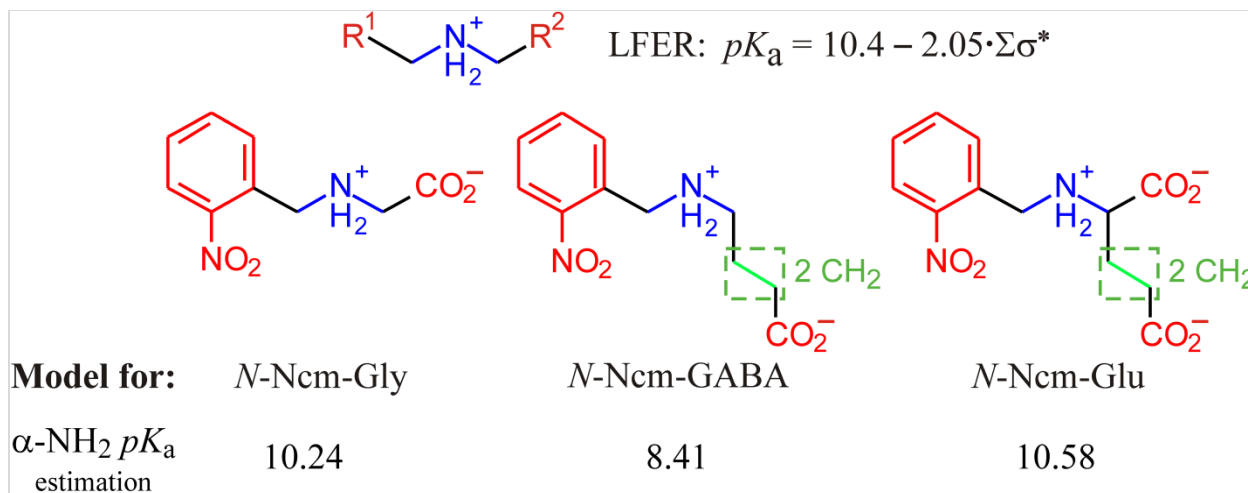

The Taft equation (LFER) for estimating the  $pK_a$  of a secondary amine with the general formula  $R^1CH_2NHCH_2R^2$  is  $pK_a = 10.4 - 2.05 \cdot \Sigma\sigma^*$  [1], where  $\sigma^*$  is a substituent constant, and  $\Sigma\sigma^*$  represents the summation of all  $\sigma^*$  values applicable to a particular molecule. Generally, each additional  $CH_2$  between a functional group and the acidic or basic center attenuates the  $\sigma^*$  of the functional group by a factor of 0.4. Finally,  $\sigma^*$  is not available for the 6-nitro-7-coumarinyl group; therefore, we use the  $\sigma^*$  for 2-nitrophenyl, which should accurately reflect the effect of a 2-nitroaryl group. Estimation of the amino  $pK_a$  for the three *N*-Ncm amino acids is summarized below; the Taft equation and  $\sigma^*$  values used are tabulated in Perrin et al. [1].

#### *N*-Ncm-Gly

$$2\text{-NO}_2\text{Ph} \quad \sigma^* = +1.14$$

$$\text{CO}_2^- \quad \sigma^* = -1.06$$

$$pK_a = 10.4 - 2.05 \cdot [1.14 - 1.06] = 10.236$$

#### *N*-Ncm-GABA

$$2\text{-NO}_2\text{Ph} \quad \sigma^* = +1.14$$

$$\gamma\text{-CO}_2^- \quad \sigma^* = -1.06, \text{ attenuated by } (0.4)^2 \text{ due separation by 2 CH}_2 \text{ groups}$$

$$pK_a = 10.5 - 2.05 \cdot [1.14 - 1.06(0.4)^2] = 8.411$$

#### *N*-Ncm-Glu

$$2\text{-NO}_2\text{Ph} \quad \sigma^* = +1.14$$

$$\alpha\text{-CO}_2^- \quad \sigma^* = -1.06$$

$$\gamma\text{-CO}_2^- \quad \sigma^* = -1.06, \text{ attenuated by } (0.4)^2 \text{ due separation by 2 CH}_2 \text{ groups}$$

$$pK_a = 10.5 - 2.05 \cdot [1.14 - 1.06 - 1.06(0.4)^2] = 10.584$$

1. Perrin DD, Dempsey B, Serjeant EP. *pKa Prediction for Organic Acids and Bases*: Springer Netherlands; 1981.
