# Supplementary material for: Ncm, a Photolabile Group for Preparation of Caged Molecules: Synthesis and Biological Application
Source: PLOS journal article supplement (doi:10.1371/journal.pone.0163937), 2016-10-03

**S5 Fig. Ncm chromophore ring opening is fully reversible**

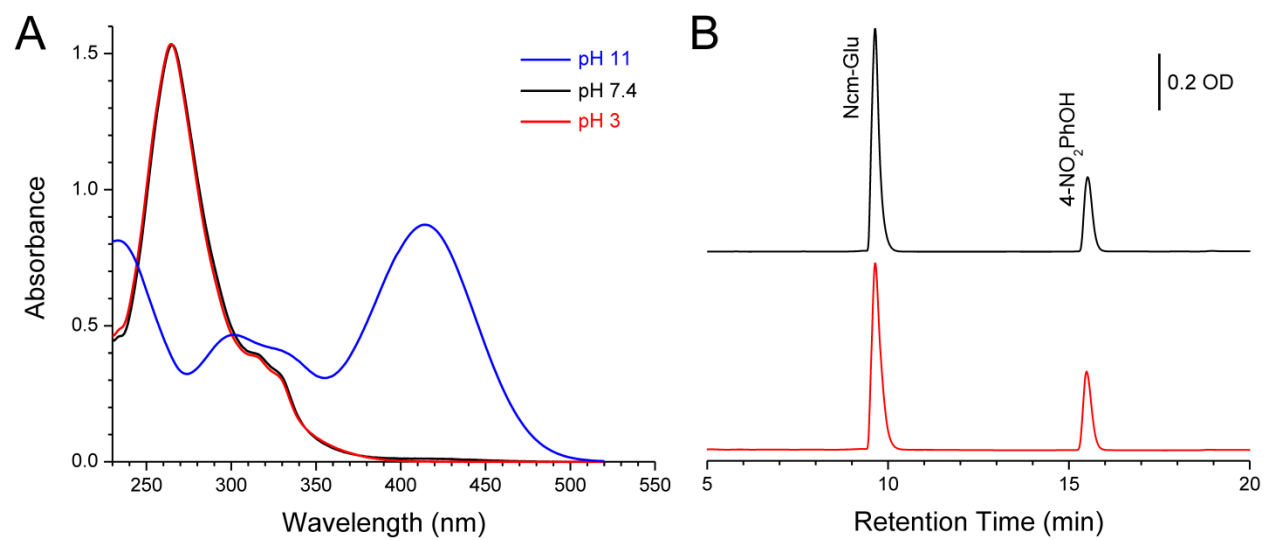

Supplement: S4 (10.1371/journal.pone.0163937.s004) [file journal.pone.0163937.s004]
